# Supplementary material for: The Primary Visual Cortex Is Differentially Modulated by Stimulus-Driven and Top-Down Attention
Source: PubMed Central journal article supplement (PMC4701232; doi:10.1371/journal.pone.0145379), 2016-01-05
Supplement: pone.0145379.s001.pdf [file pone.0145379.s001.pdf]

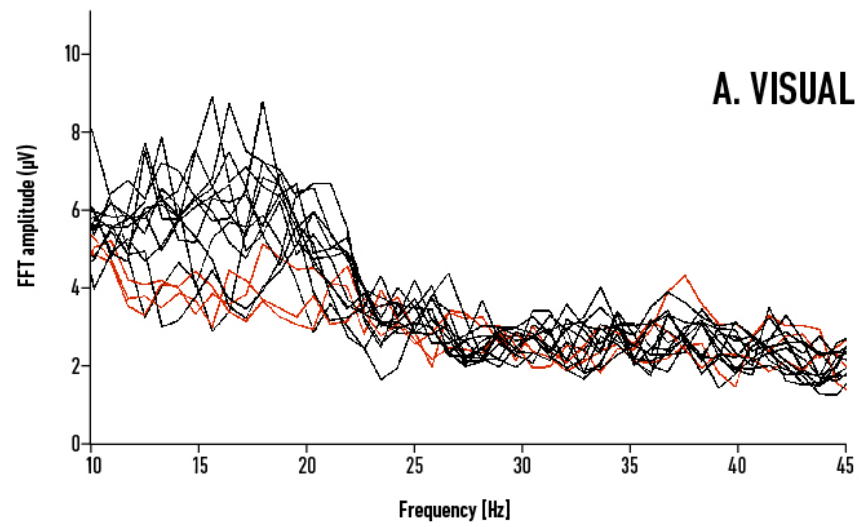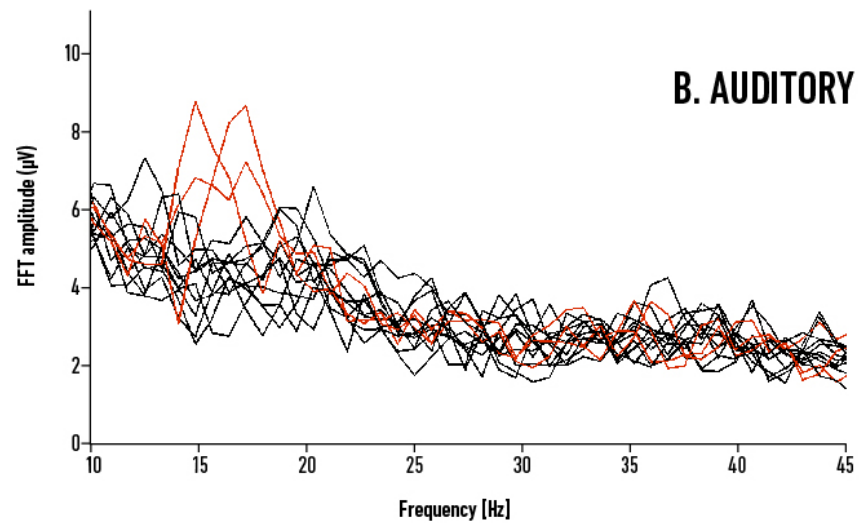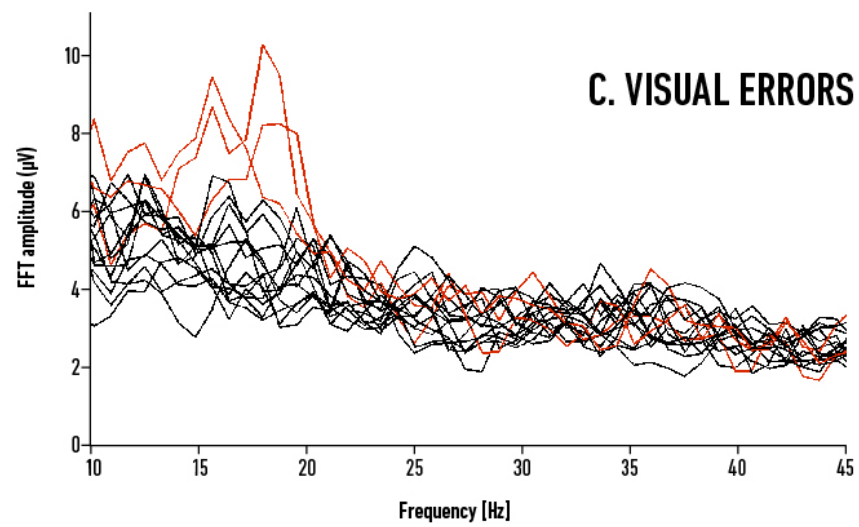

**S1 Fig. Variability between the single-trial FFT spectra in the anticipatory paradigm.**
