# Supplementary material for: The Primary Visual Cortex Is Differentially Modulated by Stimulus-Driven and Top-Down Attention
Source: PubMed Central journal article supplement (PMC4701232; doi:10.1371/journal.pone.0145379), 2016-01-05
Supplement: pone.0145379.s003.pdf [file pone.0145379.s003.pdf]

(vis high – aud low) / aud low

### A. STIMULUS-DRIVEN ATTENTION

|          |        |        |        |
|----------|--------|--------|--------|
|          | Cx18/1 | Cx17/1 | Cx18/2 |
| Cat A    | -12.69 | 1.22   | -15.00 |
|          | Cx17/1 | Cx17/2 | Cx17/3 |
| Cat B    | -14.61 | -20.41 | 0.63   |
|          | Cx18/1 | Cx18/2 |        |
| Cat F-p1 | -2.18  | -14.14 |        |

Mean=-9.6 ± 2.9      P=0.01 (from zero)

### B. ANTICIPATORY ATTENTION

|          |        |        |        |        |
|----------|--------|--------|--------|--------|
|          | Cx17/1 | Cx17/2 | Cx17/3 |        |
| Cat C    | 18.14  | 17.79  | 29.82  |        |
|          | Cx17/1 | Cx18/1 | Cx17/2 | Cx18/2 |
| Cat D    | 5.78   | 6.15   | 6.04   | 14.36  |
|          | Cx17/1 | Cx17/2 | Cx18/1 | Cx18/2 |
| Cat E    | 7.54   | 1.17   | 1.92   | 4.23   |
|          | Cx18/1 | Cx18/2 |        |        |
| Cat F-p2 | 11.27  | 2.70   |        |        |

Mean=9.8 ± 2.3      P=0.001 (from zero)

**S3 Fig. Relative amplitude differences of the evoked potentials in different beta states during the tasks of visual and auditory modalities**
