# Supplementary material for: The Primary Visual Cortex Is Differentially Modulated by Stimulus-Driven and Top-Down Attention
Source: PubMed Central journal article supplement (PMC4701232; doi:10.1371/journal.pone.0145379), 2016-01-05
Supplement: pone.0145379.s004.pdf [file pone.0145379.s004.pdf]

## STIMULUS-DRIVEN ATTENTION

## ANTICIPATORY ATTENTION

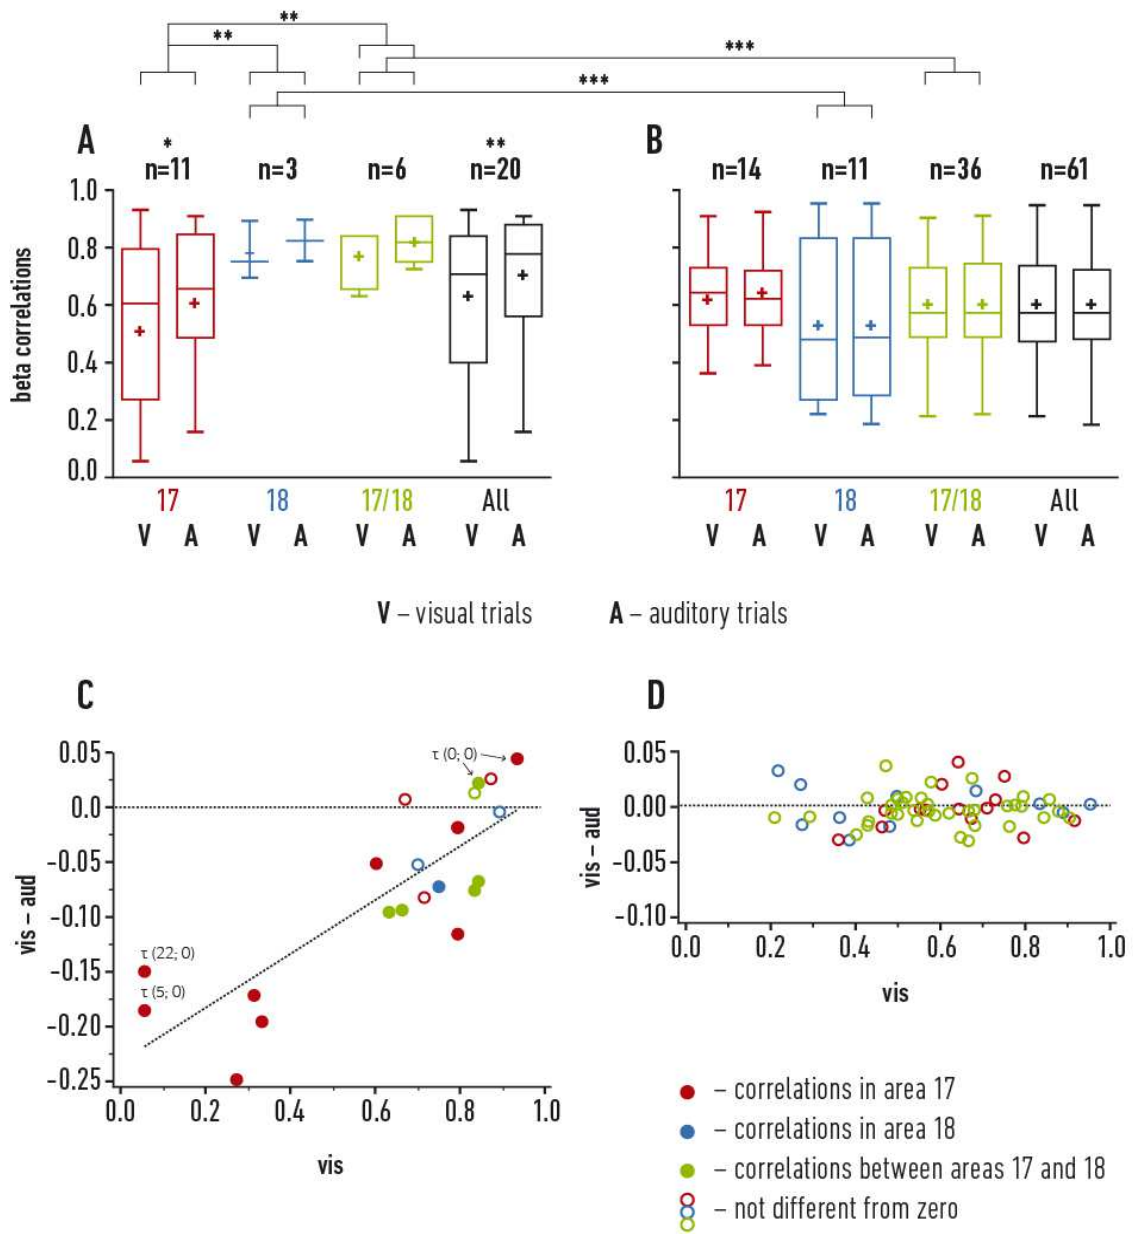

**S4 Fig. Synchronization of beta activity in different areas of the visual cortex.**
